# Supplementary material for: The Study of Corrosion Behaviors of Carbon Steel Weldments and Their Inhibition in Simulated Pore Solution Using Multi-Electrode Array Technique
Source: MDPI journal article supplement (doi:10.3390/app11188278), 2021-09-07
Supplement: s1 [file s1]

Supplementary Materials

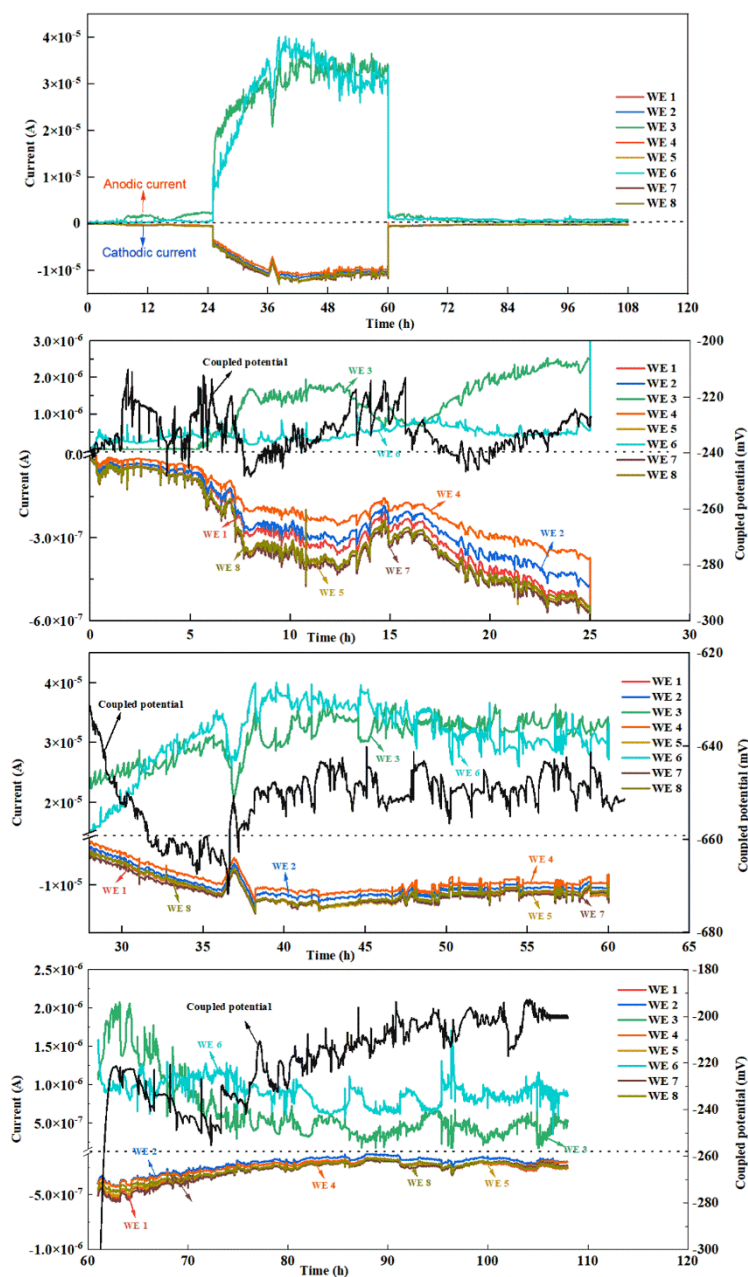

**Figure S1** Time dependence of the galvanic currents among the repeat sample#1 (a), the galvanic currents at 0 h to 28 h (b), the galvanic currents at 38 h to 61 h (c), and the galvanic currents at 61 h to 108 h (d).

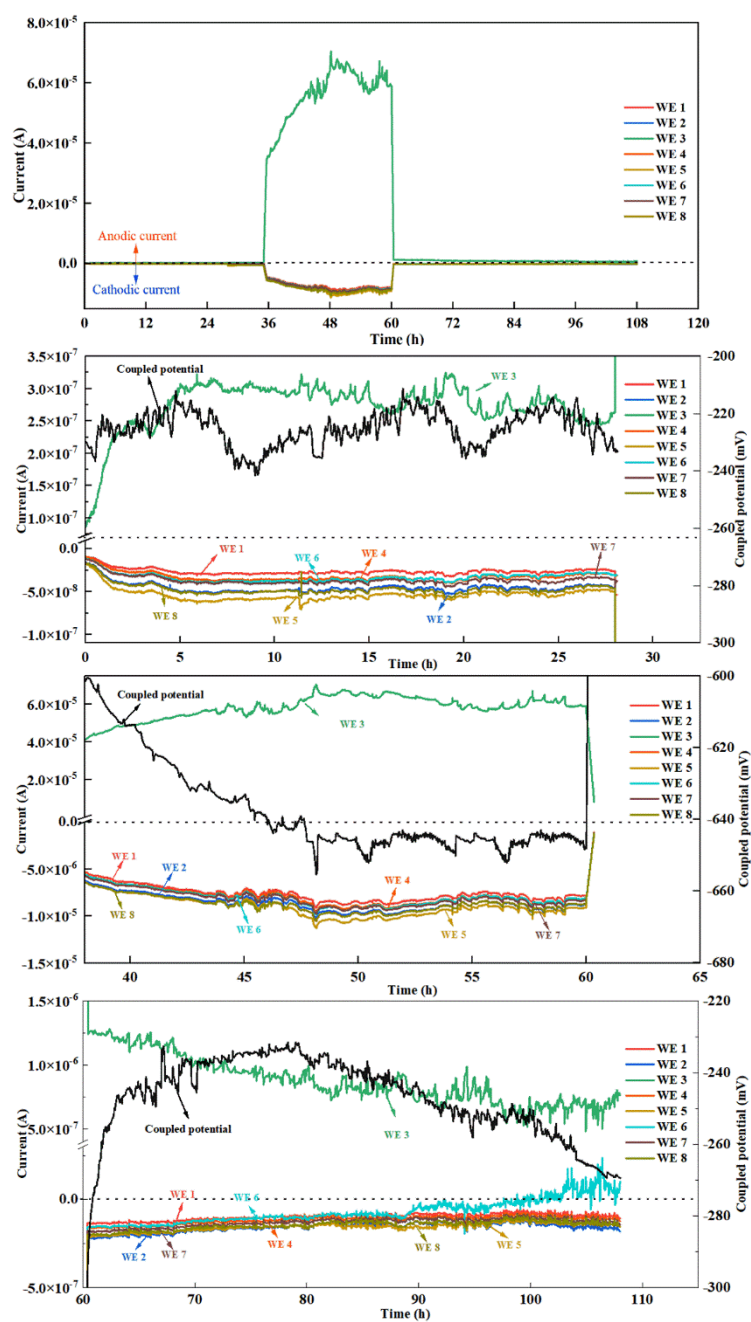

**Figure S2** Time dependence of the galvanic currents among the repeat sample#2 (a), the galvanic currents at 0 h to 25 h (b), the galvanic currents at 36 h to 61 h (c), and the galvanic currents at 61 h to 108 h (d).
