# Supplementary material for: The Study of Corrosion Behaviors of Carbon Steel Weldments and Their Inhibition in Simulated Pore Solution Using Multi-Electrode Array Technique
Source: MDPI journal article supplement (doi:10.3390/app11188278), 2021-09-07
Supplement: s1 [file s1]

Archive with 1 entries (1 files):
- applsci-1337630-supplementary.pdf
